# Supplementary material for: Rapid coupling between solid earth and ice volume during the Quaternary
Source: PubMed Central journal article supplement (PMC7970951; doi:10.1038/s41598-021-84448-7), 2021-03-11
Supplement: 41598_2021_84448_MOESM5_ESM.pdf [file 41598_2021_84448_MOESM5_ESM.pdf]

1  
2  
3  
4  
5  
6  
7  
8  
9  
10  
11  
12  
13  
14  
15  
16  
17  
18  
19  
20  
21  
22  
23  
24  
25  
26  
27  
28  
29  
30  
31  
32

## Supplementary Information for

Rapid coupling between solid earth and ice volume during the Quaternary

Yusuke Kuwahara, Kazutaka Yasukawa, Koichiro Fujinaga, Tatsuo Nozaki, Junichiro Ohta, Honami Sato, Jun-Ichi Kimura, Kentaro Nakamura, Yusuke Yokoyama, Yasuhiro

Kato

Correspondence to: [ykato@sys.t.u-tokyo.ac.jp](mailto:ykato@sys.t.u-tokyo.ac.jp)

33  
34  
35  
36  
37

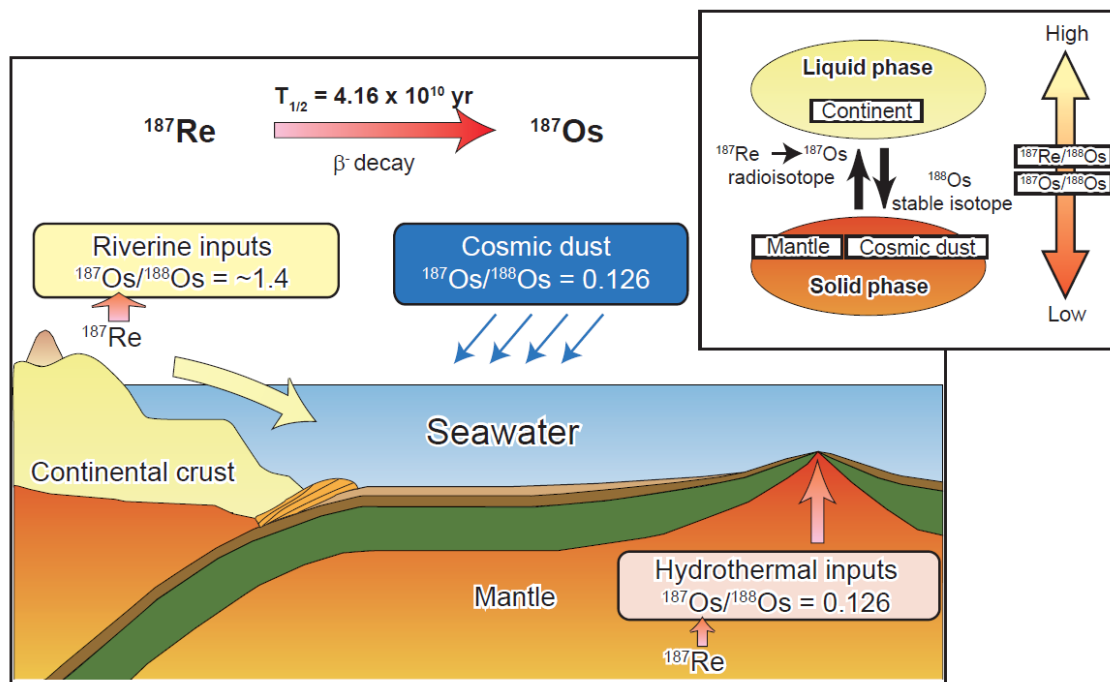

38  
39  
40  
41  
42  
43  
44  
45  
46  
47  
48  
49  
50  
51  
52

**Supplementary Figure S1. Schematic illustration of the marine Os isotope system.**

Seawater  $^{187}\text{Os}/^{188}\text{Os}$  is controlled by the balance of continental riverine, hydrothermal, and cosmic dust inputs. Because Re is less compatible than Os in partial melts,  $^{187}\text{Re}$ , the parent nuclide of  $^{187}\text{Os}$ , is enriched in the liquid phase (which becomes continental), whereas unradiogenic  $^{188}\text{Os}$  is relatively more concentrated in the solid phase (i.e. in mantle-like materials). As a result,  $^{187}\text{Os}/^{188}\text{Os}$  values of continental-derived materials are higher than those of mantle-like material (hydrothermal fluid and cosmic dust).

53  
54  
55  
56  
57  
58  
59

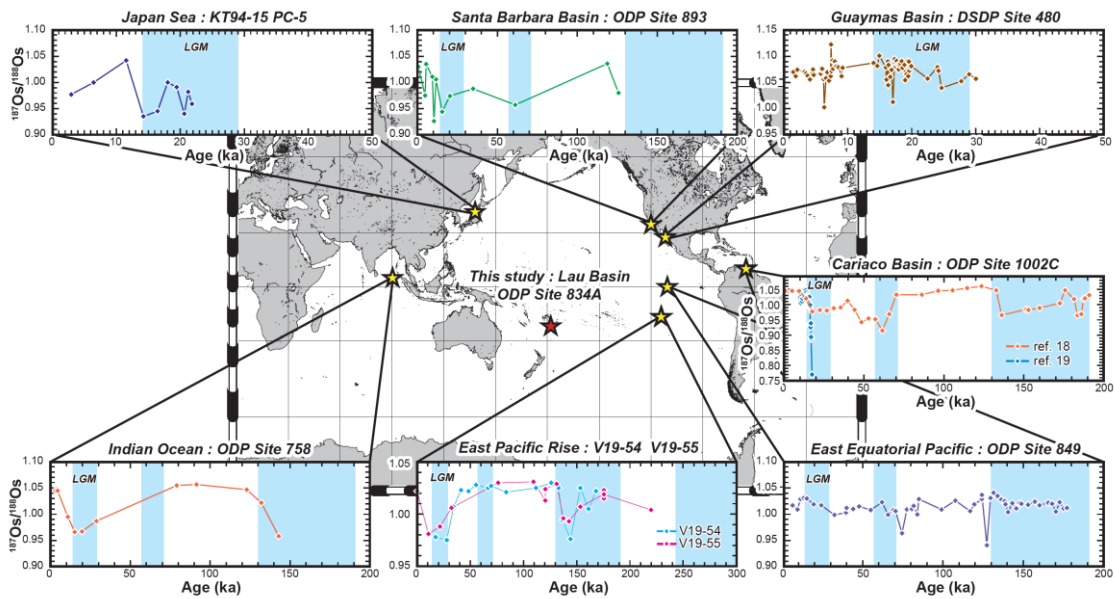

60  
61  
62  
63

64 **Supplementary Figure S2. Compilation of previously published data<sup>17–19,76–78</sup> used**  
65 **for the reconstruction of the Quaternary seawater  $^{187}\text{Os}/^{188}\text{Os}$  record.** Each record  
66 shows initial  $^{187}\text{Os}/^{188}\text{Os}$  values. Vertical blue bars indicate glacial periods (marine  
67 isotope stages 2, 4, 6, and 8)<sup>22</sup>. Although almost all of these studies show a negative  
68 excursion of  $^{187}\text{Os}/^{188}\text{Os}$  during the last glacial maximum (LGM), the profiles are not  
69 otherwise consistent among the studies. Data sources: V19-54, V19-55 (ref. 17); ODP  
70 Site 1002C (refs. 18, 19); DSDP Site 480 (ref. 19); ODP Site 849 (ref. 19); ODP Site 893  
71 (ref. 76); KT94-15 PC-5 (ref. 77); ODP Site 758 (ref. 78). The world map is generated by  
72 the Generic Mapping Tools (GMT Version 6.0.0,  
73 <https://github.com/GenericMappingTools/gmt/releases/tag/6.0.0>).

74

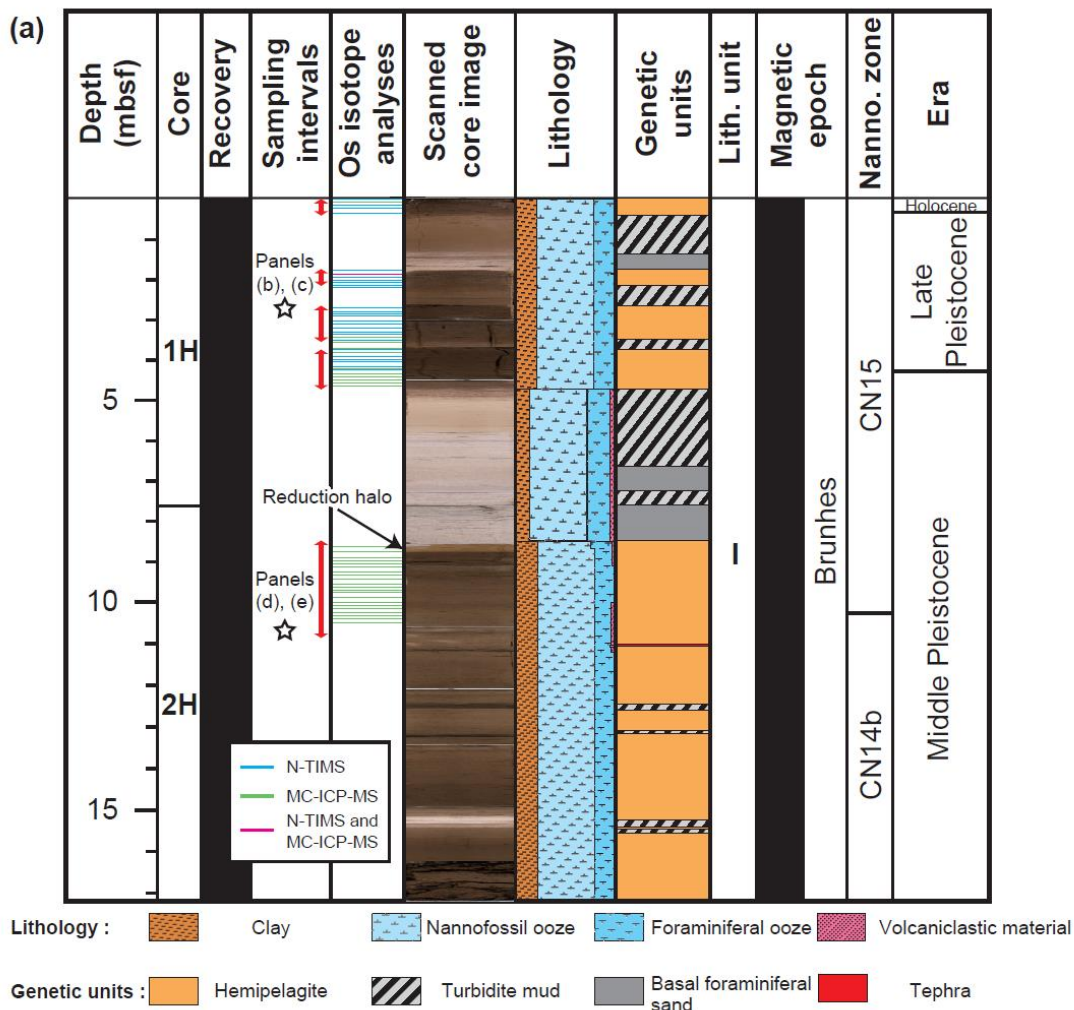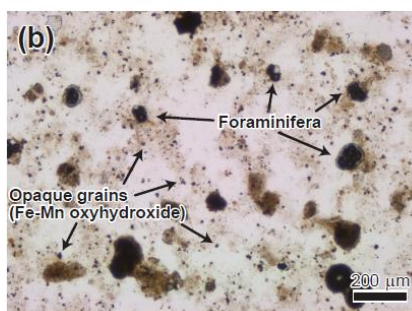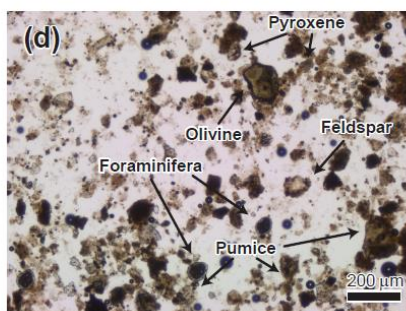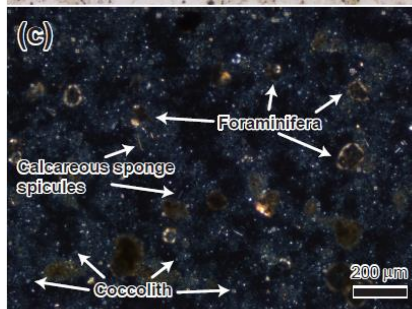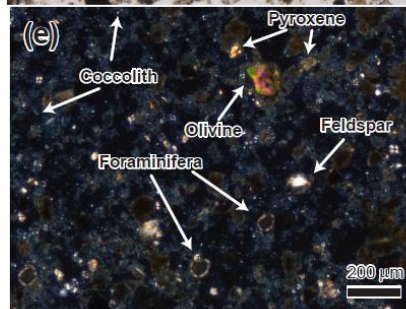

77 **Supplementary Figure S3. Core lithology and smear slide microphotographs.** (a)  
78 Lithostratigraphy, genetic stratigraphy, and core photograph of the ODP Site 834A cores  
79 1H and 2H (modified from refs. 46–48). Magnetostratigraphic epoch, biostratigraphic  
80 zone, and depositional era<sup>47,48</sup> are shown alongside. Double-headed red arrows in the  
81 “sampling intervals” column indicates the sampling ranges from which we picked  
82 samples for foraminiferal  $\delta^{18}\text{O}$  analyses ( $n = 125$ ). We avoided sampling the turbiditic  
83 zones. For the bulk chemical and Re-Os isotope analyses, we used sediments from  
84 shallower than 10.4 mbsf in the core ( $n = 115$ ) to avoid contamination with volcanoclastic  
85 components, which increase downward in the core. Bars in the Os isotope analyses  
86 column indicate sampling points for the analyses. Light blue and green bars indicate  
87 sampling points for analyses by N-TIMS and MC-ICP-MS, respectively. The magenta  
88 bar indicates the sampling point for duplicate analysis, by both N-TIMS and MC-ICP-  
89 MS. The light orange facies in the core photograph (black arrow) is the reduction halo.  
90 (b–e) Microphotographs of smear slide samples of sediments from ODP Site 834A. (b, c)  
91 Metalliferous carbonate (Core 1H, Section 2, 118–120 cm; 2.69 mbsf) under (b) plane-  
92 and (c) cross-polarised light. (d, e) Sediment containing volcanoclastic materials from  
93 ODP Site 834A (Core 2H, Section 3, 9–11 cm; 10.7 mbsf) under (d) plane- and (e) cross-  
94 polarised light.  
95  
96  
97

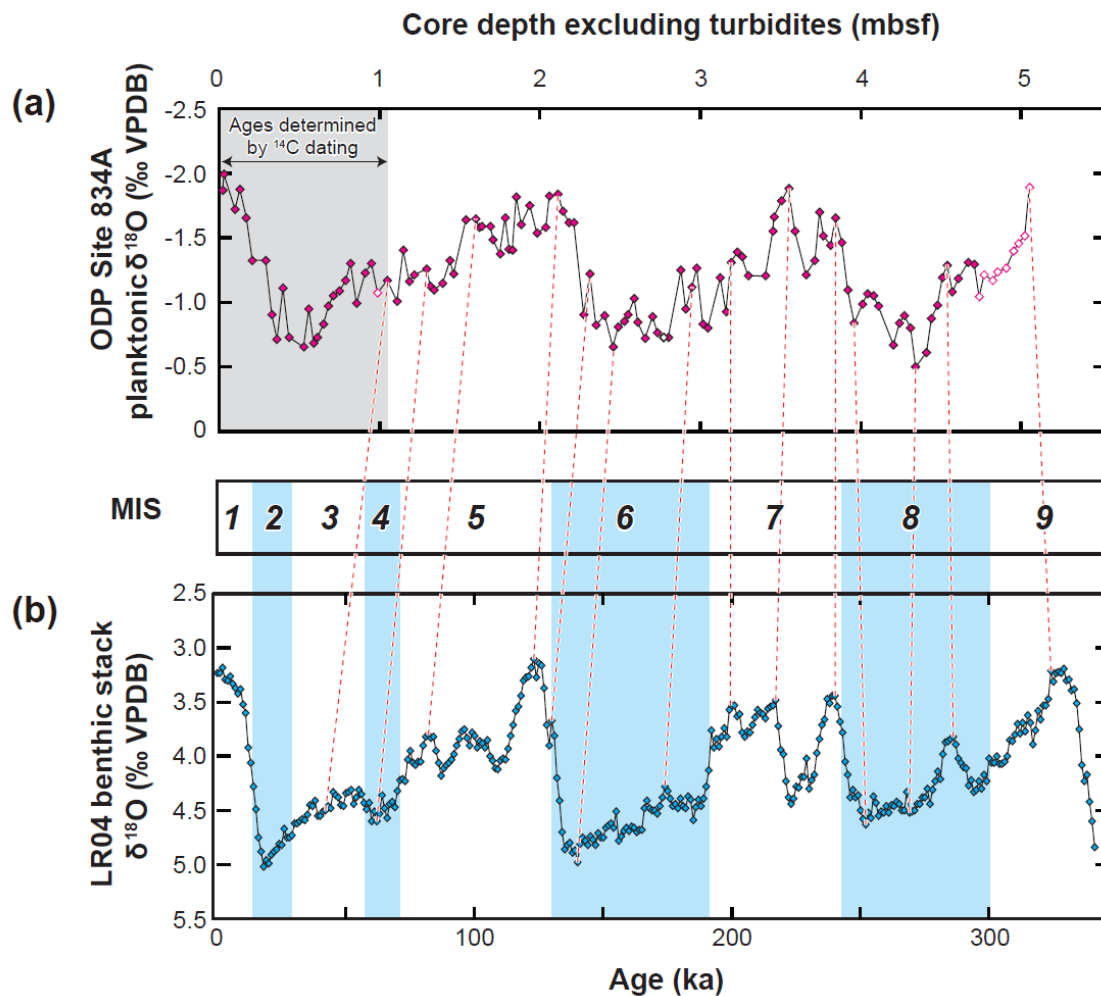

98

99

100 **Supplementary Figure S4. Correlation between (a)  $\delta^{18}\text{O}$  data from ODP Site 834A**  
 101 **and (b) the reference  $\delta^{18}\text{O}$  profile (LR04 benthic stack<sup>22</sup>).** Grey shading indicates the  
 102 age range of samples dated by radiocarbon analysis. The inflection points of the curves  
 103 were determined in this study. Turbidite intervals have been omitted. Vertical blue bars  
 104 indicate glacial periods, and the numerals indicate MISs. The solid magenta diamonds in  
 105 (a) indicate samples analysed for both  $\delta^{18}\text{O}$  and bulk chemistry. The open magenta  
 106 diamonds in (a) indicate samples analysed only for  $\delta^{18}\text{O}$ . The open black square at 2.77  
 107 mbsf in (a) indicates the sample for which we could not calculate the standard deviation  
 108 of  $\delta^{18}\text{O}$ .

109

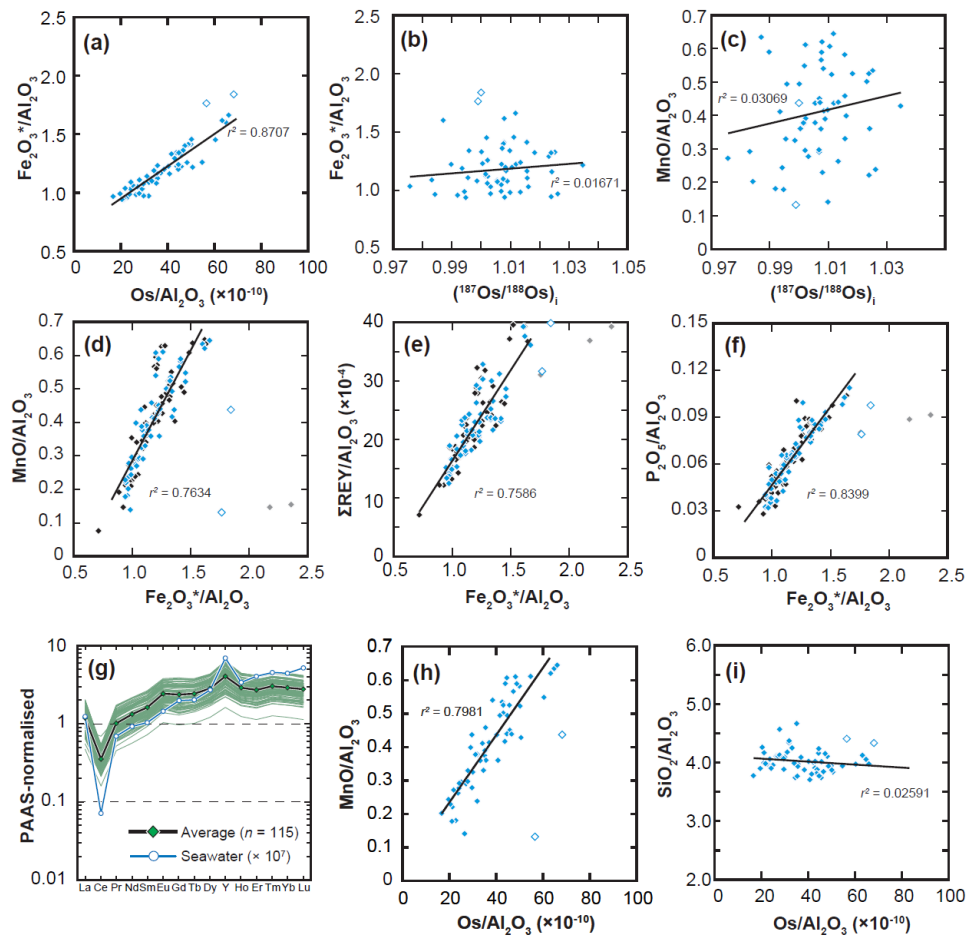

110

111 **Supplementary Figure S5. Geochemical data of ODP Site 834A sediments.** Panels (a),  
 112 (h), and (i) show Os versus  $\text{Fe}_2\text{O}_3^*$  (total iron as  $\text{Fe}_2\text{O}_3$ ), MnO, and  $\text{SiO}_2$ , respectively.  
 113 Panels (b) and (c) show  $(^{187}\text{Os}/^{188}\text{Os})_i$  versus  $\text{Fe}_2\text{O}_3^*$  and MnO, respectively. Panels (d),  
 114 (e), and (f) show  $\text{Fe}_2\text{O}_3^*$  versus MnO, total rare-earth elements + Y ( $\Sigma\text{REY}$ ), and  $\text{P}_2\text{O}_5$   
 115 contents, respectively. The contents of all elements are normalised by the  $\text{Al}_2\text{O}_3$  content  
 116 and were calculated on a carbonate-free basis (CFB). The solid blue diamonds in panels  
 117 (a) to (f) and (h) to (i) indicate samples used for Re-Os isotope analyses, and black  
 118 diamonds indicate samples not used for Re-Os analyses. Samples collected from the  
 119 reduction halo (see Methods) are indicated by light blue open diamonds (Re-Os analysed)  
 120 or grey diamonds. Linear regression lines and  $r^2$  values were calculated by using all data  
 121 except data from the reduction halo samples. Panel (g) shows patterns of REY calculated  
 122 on a CFB and normalised by the post-Archean average Australian shale (PAAS<sup>51</sup>). The  
 123 black line with green diamonds shows the average of all samples ( $n = 115$ ). The blue line  
 124 with open blue circles shows the REY pattern of seawater ( $\times 10^7$ )<sup>79</sup>.

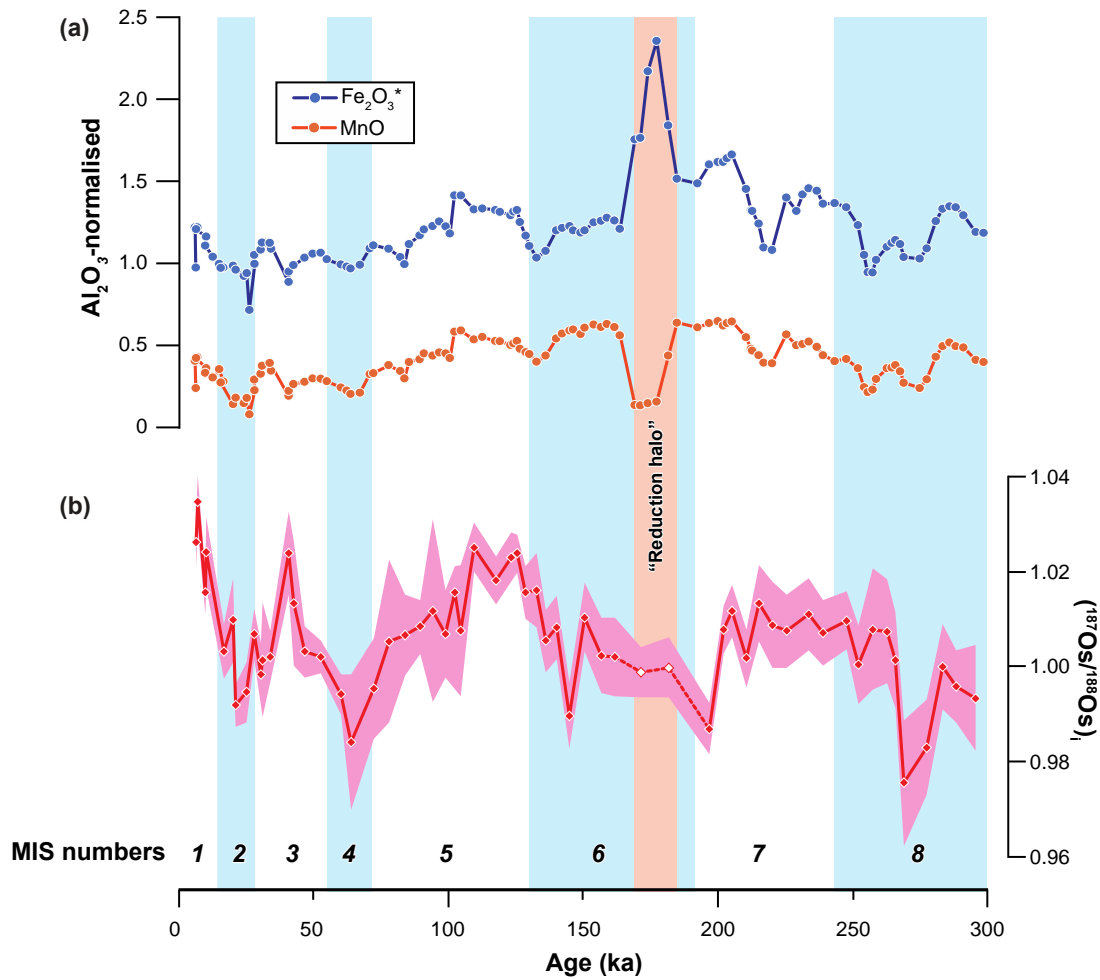

125

126

127

128 **Supplementary Figure S6. Age profiles of (a) Fe<sub>2</sub>O<sub>3</sub>\* (total iron as Fe<sub>2</sub>O<sub>3</sub>) and MnO**

129 **contents, and (b) the (<sup>187</sup>Os/<sup>188</sup>Os)<sub>i</sub> record in ODP Site 834A sediments. In panel (a),**

130 **the Fe<sub>2</sub>O<sub>3</sub>\* and MnO contents, which were calculated on a carbonate-free basis (CFB),**

131 **are normalised by the Al<sub>2</sub>O<sub>3</sub> content. The red shaded area in panel (b) indicates the 2SD**

132 **range of (<sup>187</sup>Os/<sup>188</sup>Os)<sub>i</sub>. The vertical orange bar indicates the reduction halo<sup>23</sup>, which is**

133 **developed below the turbiditic layer. Vertical blue bars indicate glacial periods (MIS 2, 4,**

134 **6, 8).**

135



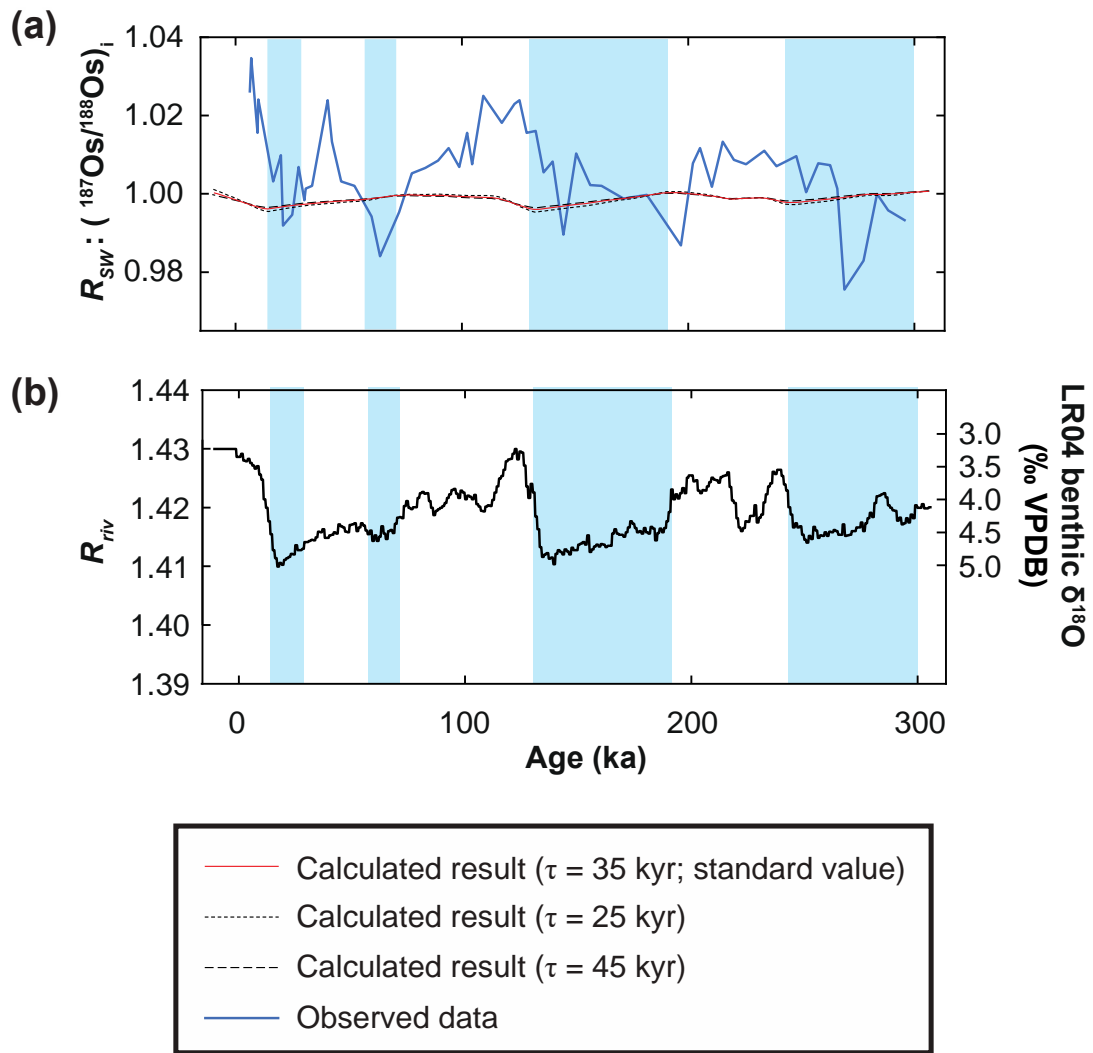

136

137

138 **Supplementary Figure S7. Simulated seawater ( $^{187}\text{Os}/^{188}\text{Os})_i$  under the scenario that**  
 139 **the riverine Os isotopic composition fluctuated in association with glacial–**  
 140 **interglacial cycles.** (a) Calculated Os isotopic ratio of seawater ( $R_{SW}$ ), and (b) Os isotopic  
 141 ratio of river water ( $R_{riv}$ ) imposed on the model. Each Os flux (riverine, hydrothermal,  
 142 and cosmic) was set to a constant value.  $R_{riv}$  was made to fluctuate between 1.43 and 1.41  
 143 in synchrony with the LR04 benthic stack<sup>22</sup>, reflecting the growth and regression of ice  
 144 sheets (b). In panel (a), the results of calculations using Os residence times in the ocean  
 145 of  $\tau = 25$  kyr and 45 kyr are also shown. The fluctuations of calculated  $R_{SW}$  are small  
 146 under this scenario, and they do not correspond to the variations in the observed data (a).  
 147 Vertical blue bars indicate glacial periods.

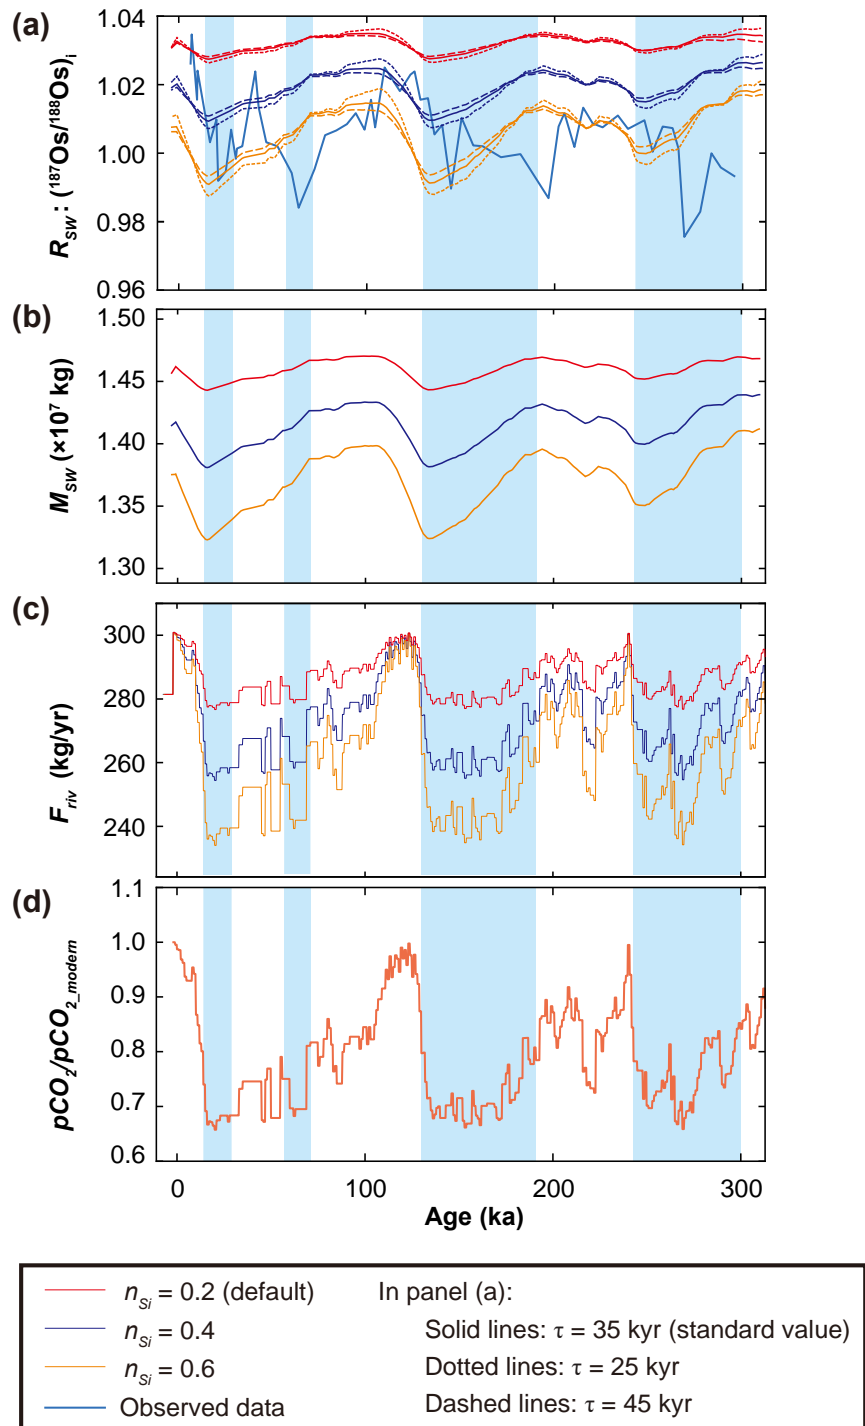

148

149 **Supplementary Figure S8. Simulated seawater  $(^{187}\text{Os}/^{188}\text{Os})_i$  under the scenario that**

150 **the riverine Os flux varied in association with glacial–interglacial cycles. (a)**

151 **Calculated Os isotopic ratio of seawater ( $R_{SW}$ ), (b) seawater Os inventory ( $M_{SW}$ ), (c)**

152 **riverine Os flux ( $F_{riv}$ ) imposed on the model, and (d)  $p\text{CO}_2$  data from the Vostok ice core<sup>68</sup>.**

153 **The  $^{187}\text{Os}/^{188}\text{Os}$  value of each Os flux (riverine, hydrothermal, and cosmic) was assumed**

154 to be constant.  $F_{\text{riv}}$  fluctuated along with  $p\text{CO}_2$  (d). The  $n_{\text{Si}}$  value (silicate weathering  
155 parameter, see Methods) was set at 0.2 (default, red lines), and then at 0.4 (blue lines) and  
156 0.6 (orange lines). With  $n_{\text{Si}} = 0.2$  (panel a, red lines), the calculated  $R_{\text{SW}}$  fluctuations did  
157 not show any relationship to the observed data. Even with  $n_{\text{Si}} = 0.4$  or 0.6, fluctuations in  
158 the calculated profiles did not correspond to variations in the observed  $^{187}\text{Os}/^{188}\text{Os}$  profile.  
159 In panel (a), solid lines, dotted lines, and dashed lines indicate the calculation results  
160 obtained using  $\tau = 35$  kyr (default), 25 kyr, and 45 kyr, respectively. Vertical blue bars  
161 indicate glacial periods<sup>22</sup>.

162

163

164

165

166

167

168

169

170

171

172

173

174

175

176

177

178

179

180

181

182

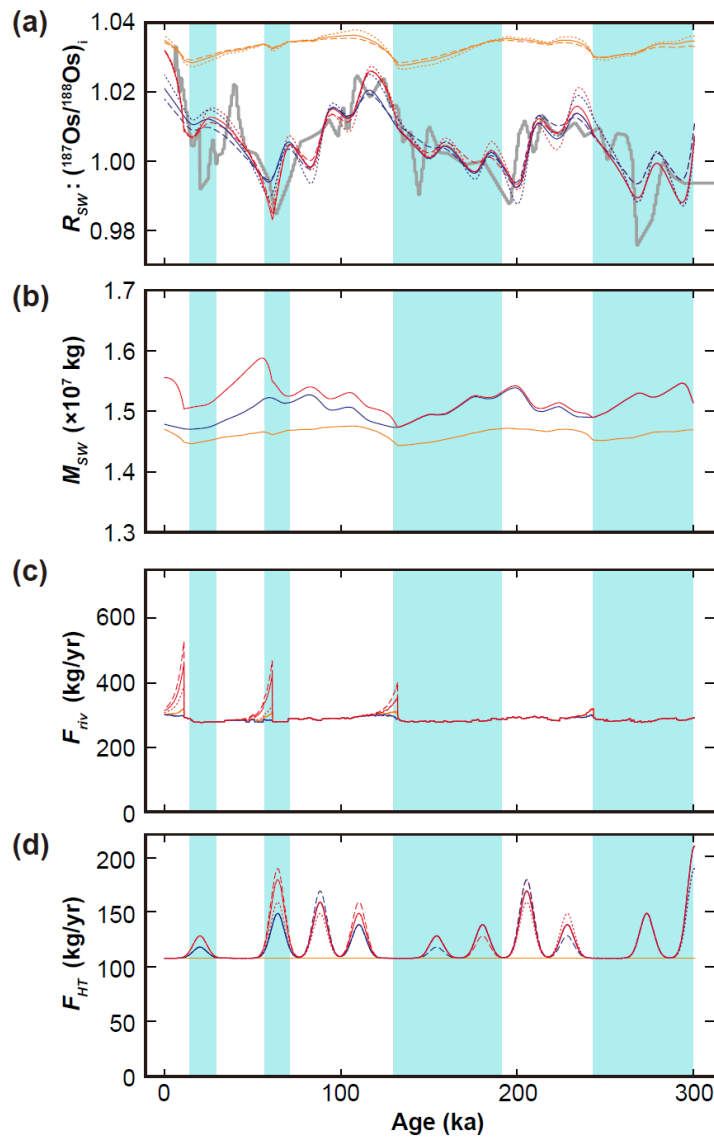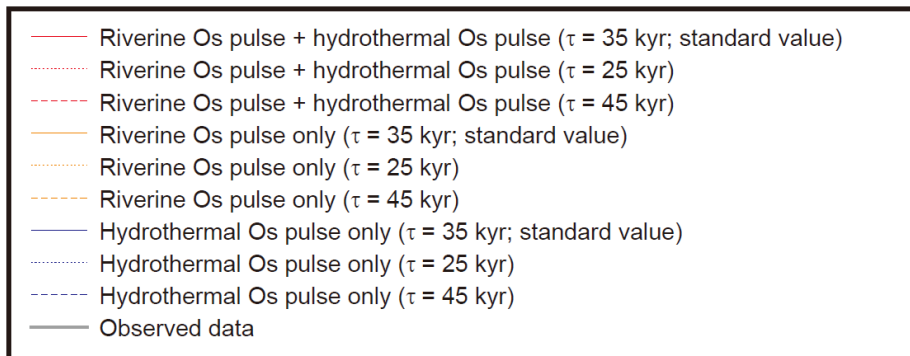

183

184 **Supplementary Figure S9. Simulated seawater  $(^{187}\text{Os}/^{188}\text{Os})_i$  under the scenario that**

185 **includes riverine and hydrothermal Os pulses.** (a) Calculated Os isotopic ratio of

186 seawater ( $R_{\text{SW}}$ ), (b) seawater Os inventory ( $M_{\text{SW}}$ ), (c) riverine Os flux ( $F_{\text{riv}}$ ) imposed on

187 the model, and (d) hydrothermal Os flux ( $F_{\text{HT}}$ ) imposed on the model. The  $^{187}\text{Os}/^{188}\text{Os}$

188 value of each Os flux (riverine, hydrothermal, and cosmic) was assumed to be constant.  
189 As sensitivity analyses, we also carried out calculations including only the riverine Os  
190 pulse (orange lines) or only the hydrothermal Os pulse (blue lines). Vertical blue bars  
191 indicate glacial periods<sup>22</sup>. In panels (a), (c), and (d), solid lines, dotted lines, and dashed  
192 lines indicate the calculation results obtained using  $\tau = 35$  kyr (default), 25 kyr, and 45  
193 kyr, respectively.

194

195

196

197

198

199

200

201

202

203

204

205

206

207

208

209

210

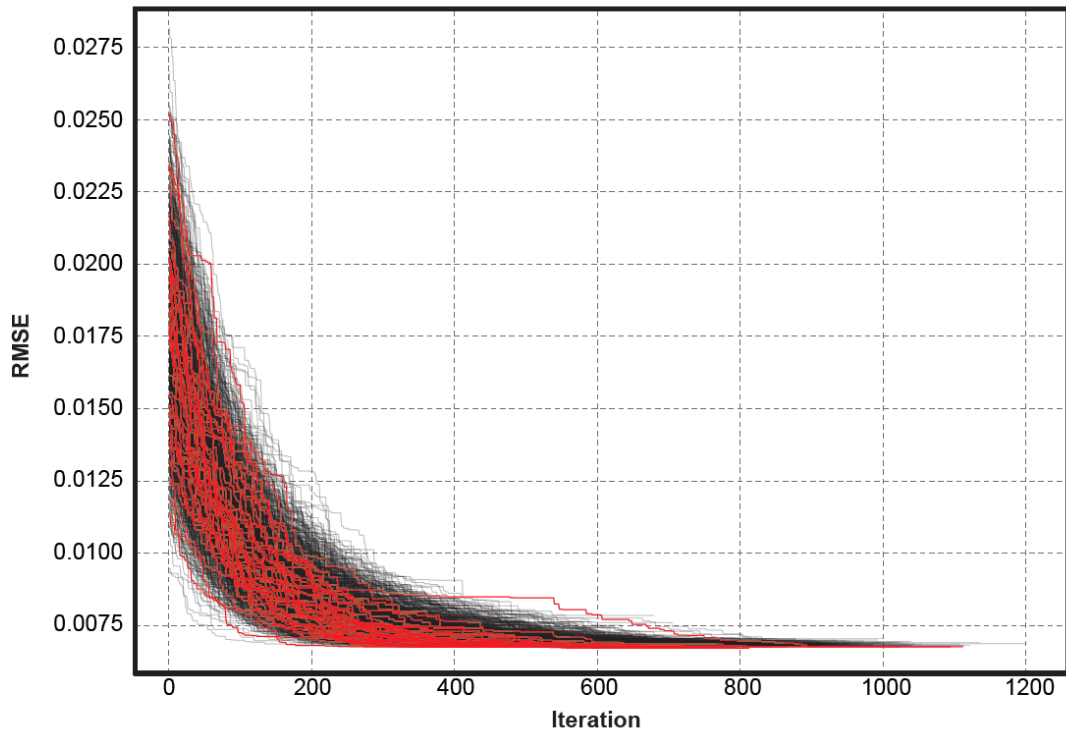

211

212

213

214

215 **Supplementary Figure S10. Converging trajectories of RMSE values between**

216 **observed data and results modelled by using a local search algorithm.** Thin black

217 lines show the converging behaviour of each local search algorithm calculation ( $n =$

218 1,000). Red lines show the converging behaviour of the calculations that generated the

219 minimum RMSE value (0.00676) among the 1,000 calculations.

220

221

222

223

224

225

226

227

228

229

230 **Supplementary Table S1. Parameters used in the mass balance calculation.**

|                                                | Symbol           | Value                   | Unit  | Remarks                                                                                                          |
|------------------------------------------------|------------------|-------------------------|-------|------------------------------------------------------------------------------------------------------------------|
| Mass of Os in seawater at steady state         | $M_{SW\_std}$    | $1.37 \times 10^{14}$ * | kg    | Value of modern ocean                                                                                            |
| $^{187}\text{Os}/^{188}\text{Os}$              |                  |                         |       |                                                                                                                  |
| Seawater at steady state                       | $R_{SW\_std}$    | 1.006                   |       | Average value of observed $^{187}\text{Os}/^{188}\text{Os}$ record                                               |
| Riverine water                                 | $R_{rv}$         | 1.43*                   |       | In the calculation verifying the effect of Os isotopic fluctuation, we fluctuated $R_{rv}$ between 1.43 and 1.41 |
| Hydrothermal fluid                             | $R_{HT}$         | 0.126 <sup>†</sup>      |       |                                                                                                                  |
| Cosmic dust                                    | $R_{cos}$        | 0.126 <sup>†</sup>      |       |                                                                                                                  |
| Os flux                                        |                  |                         |       |                                                                                                                  |
| Modern riverine flux                           | $F_{rv\_modern}$ | 301 <sup>‡</sup>        | kg/yr | Trapped fraction at estuaries (15%; ref. 64) was considered                                                      |
| Riverine flux (standard value)                 | $F_{rv\_std}$    | 281                     | kg/yr | Calculated from eq. (6). Trapped fraction at estuaries (15%; ref. 64) was considered                             |
| Hydrothermal flux (standard value)             | $F_{HT\_std}$    | 108 <sup>‡</sup>        | kg/yr |                                                                                                                  |
| Cosmic flux (standard value)                   | $F_{cos\_std}$   | 17.6 <sup>‡</sup>       | kg/yr |                                                                                                                  |
| Silicate minerals chemical weathering exponent | $n_{Si}$         | 0.2 <sup>  </sup>       |       | In the sensitivity analyses, the value was changed to 0.4 and 0.6                                                |

231 \*Peucker-Ehrenbrink & Ravizza (2000)<sup>12</sup>; †Levasseur et al. (1999)<sup>32</sup>; ‡Peucker-Ehrenbrink (2002)<sup>63</sup>; || Uchikawa & Zeebe (2008)<sup>75</sup>

232

233

234

235 **Supplementary Table S2. Area fractions and bulk rock Os isotope ratios of each**  
 236 **lithology used in the calculation of the Os isotopic ratio of riverine water.**

| Lithology                                                 | Area percentage of total ice free area* |      | [Os] (ppt)                         | $^{187}\text{Os}/^{188}\text{Os}$ | Remarks                                                                                                                |
|-----------------------------------------------------------|-----------------------------------------|------|------------------------------------|-----------------------------------|------------------------------------------------------------------------------------------------------------------------|
|                                                           | Modern                                  | LGM  |                                    |                                   |                                                                                                                        |
| Carbonates+shales                                         | 27.3                                    | 31.9 | 25 (modern), 24 (LGM) <sup>§</sup> | 1.78 <sup>‡</sup>                 | Area fractions of carbonates+shales and sandstones are based on ref. 72                                                |
| Sandstones                                                | 18.6                                    | 20.2 | 31 (16–100) <sup>‡</sup>           | 1 (0.875–1.564) <sup>‡</sup>      | Using [Os] and $^{187}\text{Os}/^{188}\text{Os}$ value of loess                                                        |
| Extrusive igneous rocks Basaltic+andesitic volcanic rocks | 5.8 <sup>§</sup>                        | 5.5  | 3.9 (0.104–46) <sup>  </sup>       | 0.39 (0.130–2.302) <sup>‡</sup>   | Based on the average [Os] and $^{187}\text{Os}/^{188}\text{Os}$ values of arc volcanic rocks presented by refs. 81,82. |
| Acidic volcanic rocks                                     | 1 <sup>§</sup>                          | 1    | 1.3 (0.048–7.781) <sup>  </sup>    | 1.04 (0.155–3.704) <sup>‡</sup>   |                                                                                                                        |
| Shields                                                   | 20                                      | 15.7 | 21 <sup>‡</sup>                    | 2.4 <sup>§</sup>                  | Based on the [Os] and $^{187}\text{Os}/^{188}\text{Os}$ values of a sample from the Canadian Shield (CAN96-31)         |
| Fold belts (complex lithology)                            | 27.5                                    | 25.7 | 31 (16–100) <sup>‡</sup>           | 1 <sup>‡</sup>                    | Using [Os] and $^{187}\text{Os}/^{188}\text{Os}$ value of loess                                                        |

237 \*Gibbs & Kump (1994)<sup>5</sup>; †Li et al. (2009)<sup>70</sup>; ‡Peucker-Ehrenbrink & Jahn (2000)<sup>11</sup>; §Dürr et al. (2005)<sup>80</sup>; || Alves et al. (1999)<sup>81</sup>; Alves et al. (2002)<sup>82</sup>; ¶Huh et al. (2004)<sup>88</sup>

\*The average Os concentrations of carbonate (8 ppt; ref. 69) and shale (31 ppt; ref. 71) weighted by the area fractions of carbonate and shale.

238

239

240

241

242

243

244

245

246

247

248

249

250

251

252

253 **Additional References in Supplementary Information**

- 254 76. Williams, G. A. & Turekian, K. The glacial–interglacial variation of seawater  
255 osmium isotopes as recorded in Santa Barbara Basin. *Earth Planet. Sci. Lett.* **228**,  
256 379-389 (2004).
- 257 77. Dalai, T. K., Suzuki, K., Minagawa, M. & Nozaki, Y. Variations in seawater  
258 osmium isotope composition since the last glacial maximum: a case study from  
259 the Japan Sea. *Chem. Geol.* **220**, 303-314 (2005).
- 260 78. Burton, K. W., Gannoun, A. & Parkinson, I. J. Climate driven glacial–interglacial  
261 variations in the osmium isotope composition of seawater recorded by planktic  
262 foraminifera. *Earth Planet. Sci. Lett.* **295**, 58-68 (2010).
- 263 79. Alibo, D. S., & Nozaki, Y. Rare earth elements in seawater: particle association,  
264 shale-normalization, and Ce oxidation. *Geochim. Cosmochim. Acta*, **63**, 363-372  
265 (1999).
- 266 80. Dürr, H. H., Meybeck, M., & Dürr, S. H. Lithologic composition of the Earth's  
267 continental surfaces derived from a new digital map emphasizing riverine material  
268 transfer. *Glob. Biogeochem. Cycles*, **19**, GB4S10 (2005).
- 269 81. Alves, S., Schiano, P. & Allègre, C. J. Rhenium–osmium isotopic investigation of  
270 Java subduction zone lavas. *Earth Planet. Sci. Lett.* **168**, 65-77 (1999).
- 271 82. Alves, S., Schiano, P., Capmas, F., & Allègre, C. J. Osmium isotope binary mixing  
272 arrays in arc volcanism. *Earth Planet. Sci. Lett.* **198**, 355-369 (2002).
- 273
